# Supplementary material
Source: publisher figshare collection journal article supplement (https://acs.figshare.com/ndownloader/files/5058676)

# **Spectroscopic and Microscopic Characterization and Behavior of an Optical pH Meter based on a Functional Hybrid Monolayer Molecular System: Porphyrin Molecules Covalently Assembled on a Molecularly Engineered Silica Surface**

Antonino Gulino,<sup>a\*</sup> Placido Mineo,<sup>b</sup> Emilio Scamporrino,<sup>a\*</sup> Daniele Vitalini,<sup>b</sup>  
and Ignazio Fragalà<sup>a\*</sup>

*<sup>a</sup>Dipartimento di Scienze Chimiche, Università di Catania and I.N.S.T.M. UdR of Catania  
and <sup>b</sup>Istituto di Chimica e Tecnologia dei Polimeri – CNR Catania,  
Viale Andrea Doria 6, 95125 Catania, Italy*

## **Supplementary Materials**

### **Figure S1**

UV-vis spectra of the solution obtained mixing 5 mL of P3 ( $1 \cdot 10^{-5}$  M) with 5 mL of  $\text{Hg}^{++}$  ( $1 \cdot 10^{-4}$  M) water solutions, recorded after 1, 5, 30, 60, 300 and 600 (dotted line) min after mixing.

### **Figure S2**

UV-vis spectra of the solution obtained mixing 5 mL of P3 ( $1 \cdot 10^{-5}$  M) with 5 mL of  $\text{Cu}^{++}$  ( $1 \cdot 10^{-4}$  M) solutions, recorded after 1, 5, 30, 60, 300 and 600 (dotted line) min after mixing.

### **Figure S3**

UV-vis spectra of the solution obtained mixing 5 mL of P3 ( $1 \cdot 10^{-5}$  M) with 5 mL of  $\text{Zn}^{++}$  ( $1 \cdot 10^{-4}$  M) solutions, recorded after 1, 5, 30, 60, 300 and 600 (dotted line) min after mixing.

Figure S1

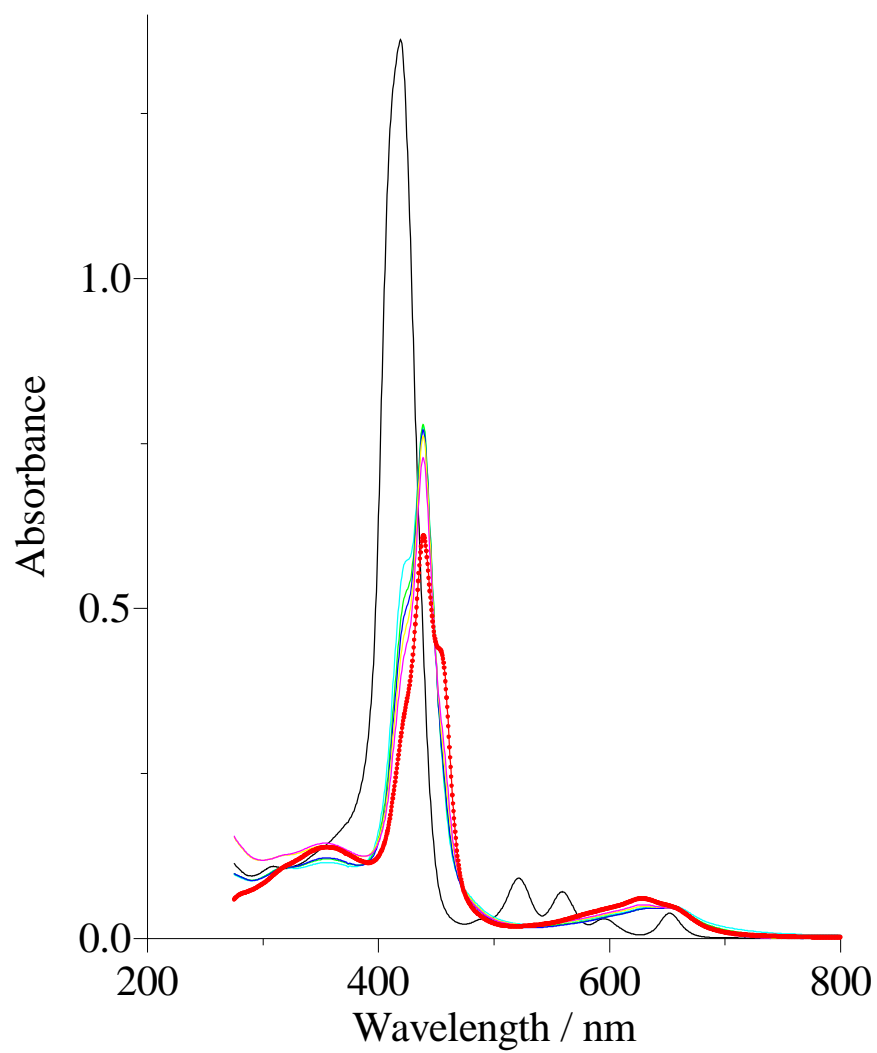

Figure S2

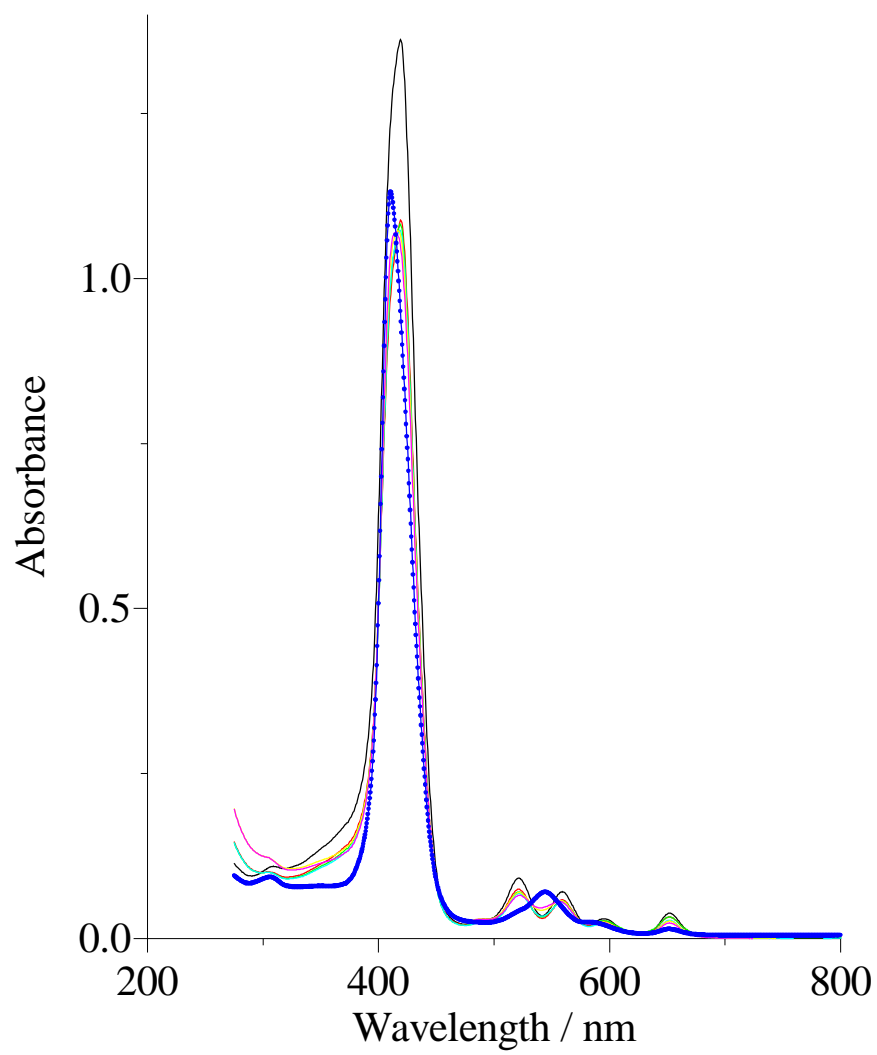

Figure S3

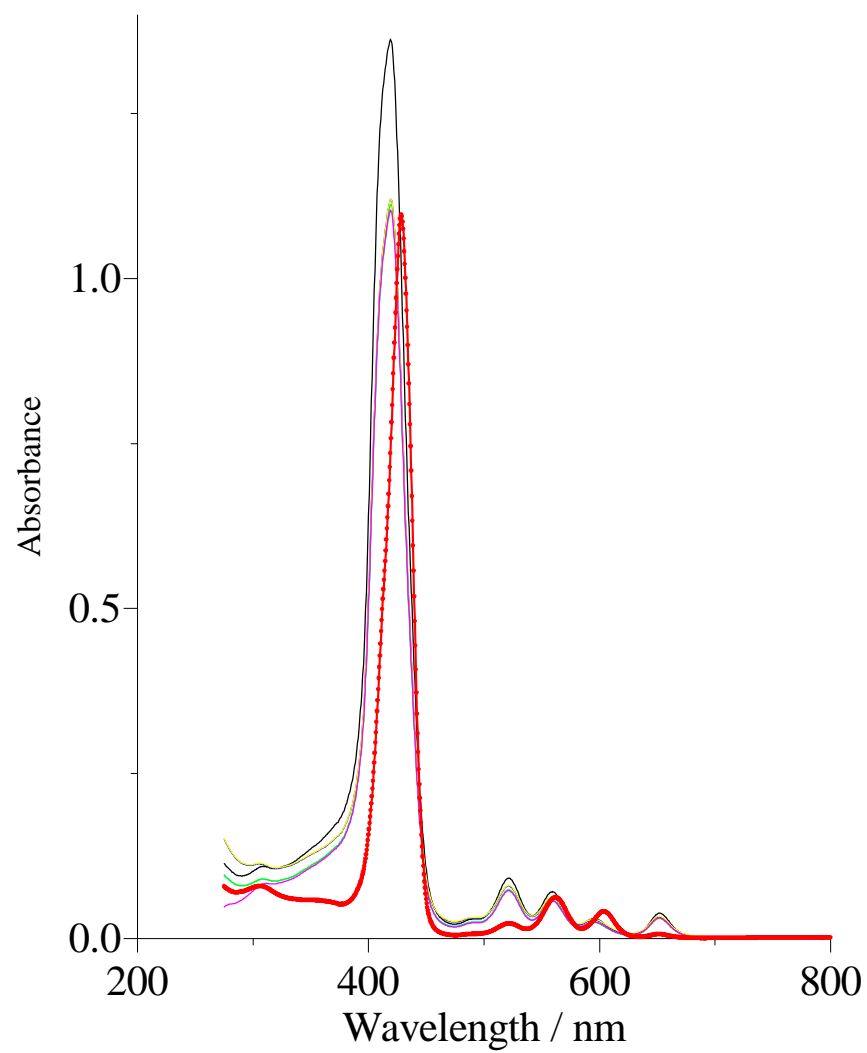

Supplement: Supplementary file 1 [file 5058676]
